# Supplementary material
Source: publisher figshare collection journal article supplement (https://acs.figshare.com/ndownloader/files/3813262)
Supplement: Supplementary file 1 [file 3813262]

# Supporting Online Materials for

## **Elemental carbon and polycyclic aromatic compounds in a 150-yr sediment core from Lake Qinghai, Tibetan Plateau, China: Influence of regional and local sources and transport paths**

Y.M. Han, C. Wei, B.A.M. Bandowe, W. Wilcke, J.J. Cao,

B.Q. Xu, S.P. Gao, X.X. Tie, G.H. Li, Z.D. Jin, Z.S. An

\* To whom correspondences should be addressed. E-mail:

yongming@ieecas.cn

This file is 26 pages in total, including materials listed below:

S1 Materials and methods;

Figures S1 to S10;

Tables S1 to S2.

### **S1 Materials and methods**

#### **S1.1. Study area and sample collection**

Lake Qinghai (36°32'-37°15' N, 99°36'-100°47' E), the largest lake in China, has a water surface altitude of 3,194 m above sea level, a surface water area of approximately 4,260 km<sup>2</sup>, and a catchment of more than 29,660 km<sup>2</sup>. Under the influence of ASM and westerly climate, the precipitation occurs mainly in summer, contributing most of the annual average values (337 mm a<sup>-1</sup>), while in winter the area

is covered by ice. The lake is divided into two sub-basins by a NNW-trending piggy-back horst<sup>1</sup>, and five major rivers surrounding the lake feed the detrital input into the lake, especially the northern sub-basin (Fig. S1B). The population in the catchment is concentrated in the cities of Gangcha, Tianjun, and Haiyan, which are also located in the northern part. Human activities are therefore expected to have greater influence in the northern part of the lake.

In September 2011, a 33-cm long sediment core QH11-1 was collected from the southern part of Lake Qinghai (in the same place as core QH03-02 from Jin et al.<sup>1</sup>) with a water depth of 28 m using a gravity corer (Uwitec, Austria; Fig. S1B). A distinct water-sediment interface and discernible laminations were observed, indicating a lack of bioturbation and post-depositional disturbance. There was a remarkable litho-stratification between the upper and lower part of the core. Sediments of the upper 6 cm were grey clay, while blackish clay sediments occurred below, which is consistent with previous reports by Xu et al.<sup>2</sup> and Jin et al.<sup>1</sup>. The core was sectioned continuously at 0.5 cm intervals, and then the sediments were freeze-dried, agate mortar ground, and frozen at -20°C until further analysis. The water content and dry density data were estimated from the mass of samples before and after freeze-drying.

Another sediment core QH03-14, located in the northern sub-basin (Fig. S1), and collected in July 2003 and of which the chronology and metal deposition has been reported before<sup>1</sup>, was used to compare EC, char, and soot deposition between the southern and northern sub-basins.

## S1.2. Chronology reconstruction

The activities of  $^{137}\text{Cs}$ ,  $^{210}\text{Pb}$ , and  $^{226}\text{Ra}$  in the depth increments of QH11-1 were analyzed for sediment dating by direct gamma counting of 3-6 g of dried sediments using a multi-channel  $\gamma$ -ray spectrometer (PerkinElmer, GWL-120-15) <sup>1, 3</sup>. The measured  $^{210}\text{Pb}$  and  $^{137}\text{Cs}$  activities against depth are presented in Fig. S2. Excess  $^{210}\text{Pb}$  ( $^{210}\text{Pb}_{\text{ex}}$ ) activities were calculated from  $^{210}\text{Pb}_{\text{tot}}$  and  $^{226}\text{Ra}$  activities with the level-by-level method. The activity of excess  $^{210}\text{Pb}_{\text{ex}}$  in the uppermost 1-cm section of core QH11-1 in our study (about 478.25 Bq kg<sup>-1</sup>) is similar to that reported by Jin et al <sup>1</sup> (474.3 Bq kg<sup>-1</sup>), who collected the sediment core from the same site as we did. However, our activities are higher than those reported by others in the southern basin <sup>4, 5</sup>, which may be associated with sediment focusing <sup>6</sup> as our cores (collected in 2003 and in 2011, respectively) were obtained in deeper water than most previous cores. However, the  $^{210}\text{Pb}_{\text{ex}}$  activity in the surface sediment of core QH11-1 is much lower than that in the northern sub-basin <sup>1, 2</sup> because of more detrital inputs in the north sub-basin of the lake.  $^{137}\text{Cs}$  exhibited a peak, which is similar with other cores collected in the Lake Qinghai <sup>1, 2, 5</sup> and this suggests that substantial mixing of the sediments did not occur. Similarly, higher  $^{137}\text{Cs}$  concentrations were found in the cores of northern sub-basin <sup>1, 2, 5</sup>.

Fig. S2 presents the chronology reconstruction for core QH11-1 using the constant rate of  $^{210}\text{Pb}$  supply (CRS) model <sup>7-9</sup> and the corresponding accumulation rates. The unconstrained CRS model predicts the  $^{137}\text{Cs}$  peak (58.1 Bq kg<sup>-1</sup>) at 3.25 cm sediment depth to AD 1977  $\pm$  3.4, which is not in agreement with the global nuclear

bomb testing period of ~1963. However, the 3.75 cm sediment depth corresponds to AD 1966  $\pm$  4.4, which is very close to the global nuclear fallout (Fig. S2C). Calculating the  $^{137}\text{Cs}$  fluxes using mass accumulation rates (MARs) as derived from the CRS model<sup>7, 8</sup> (Fig. S2F) demonstrates that the shape of the  $^{137}\text{Cs}$  peak is really broad and it is difficult to define when the maximum flux occurred. This points to post-deposition diffusional redistribution of  $^{137}\text{Cs}$  in the sediment profile which is also supported by the  $^{137}\text{Cs}$  activity data that appeared to be moved downward the core (Figs S2E). The constrained CRS model<sup>9</sup> that forces the chronology through the  $^{137}\text{Cs}$  fix-point (3.75 cm = AD 1963) yields a chronology (Fig. S2D) very close to that reconstructed using the CRS model. Thus, the “free-shape CRS model”<sup>7-9</sup> was used in our study for chronology reconstruction.

### **S1.3. EC, char, and soot measurement**

The IMPROVE (Interagency Monitoring of Protected Visual Environments) method was used to quantify EC, char, and soot concentrations following Han et al.<sup>10, 11</sup>. Briefly, ~100 mg sediment for each sample was pretreated with hydrochloric and hydrofluoric acids to remove carbonate, metal oxides, and silicates. The pretreated residues were then filtered through pre-baked (850°C for 3 hours) quartz-fiber filters (0.4  $\mu\text{m}$  pore size, Whatman) using deionized water and air dried in an oven (35°C for 8 hours). A DRI Thermal/Optical Carbon Analyzer (Atmoslytic Inc. Calabasas, CA) was used to implement the IMPROVE protocol. It reports four OC fractions (OC1 to OC4 at 120, 250, 450 and 550°C in a pure helium atmosphere), three EC fractions (EC1 to EC3 at 550, 700 and 800°C in 2% oxygen/98% helium atmosphere), and one

pyrolyzed organic carbon (POC) fraction. The POC produced in the inert atmosphere is monitored by a laser to both the reflectance and transmittance during thermal analysis. The IMPROVE protocol defined EC as the sum of the three EC fractions minus POC. Han et al.<sup>12</sup> defined char as EC1 minus POC, while soot as the sum of EC2 and EC3.

We are aware of the fact that the methodology for BC measurement is disputed<sup>13</sup>. The comparison of the different methods traditionally used for geological samples showed that the BC concentrations determined with different methods can vary by a factor of up to 571<sup>14</sup>. For aerosols, the most commonly used method is the thermal optical method with different protocols, and the concentrations measured by the different protocols for given samples on average, only varies by a factor of 2<sup>15</sup>, which is much narrower than the wide range of measured concentrations caused by the different methods used for geological samples. To ensure quality control and validation of the analytical method, standard reference materials (SRMs) need to be included into analytical protocols, which is mostly not the case. Furthermore, possible matrix effects have to be accounted for.

For several decades, the thermal optical method was mainly used to quantify aerosol EC concentrations<sup>16</sup>. Just since 2007, it was extended to measure EC in sediments and soils<sup>10,17</sup>. Based on the finding that char and soot in standard reference materials (SRMs) can be stepwise oxidized in the EC1 and EC2+3 steps, respectively, it was proposed that the IMPROVE method can be used to differentiate between char and soot<sup>12</sup>. The adaptation, validation and application of this method have been tested

in many previous studies. Positive and negative EC SRMs and environmental EC matrices<sup>13</sup> were tested in many previous studies<sup>10, 11, 18</sup>. In addition, Han et al.<sup>19</sup> demonstrated that the soot concentrations determined with the IMPROVE method (i.e. the sum of the EC2+3 steps) compared well with soot concentrations determined with the chemothermal (CTO-375) method designed to specifically measure soot carbon<sup>20-22</sup>.

In the meantime, the application of the IMPROVE method to differentiate between char and soot has been extended to aerosols<sup>23-28</sup>, sediments and soils<sup>19, 29, 30</sup>. All these studies have shown that the IMPROVE protocol delivers results which reasonably reflect the char and soot contributions to EC in the samples. For example, the char/soot ratio was successfully used to distinguish different sources in aerosol studies<sup>28, 31</sup>. A study of the spatial distribution of char and soot in urban, rural, and remote areas<sup>27</sup> revealed that char has local sources and is not far transported, while soot is regionally dispersed, which is in line with our knowledge about the larger particle size of char than of soot<sup>32</sup>. The 150 yr historic reconstruction of char and soot deposition from several sediment cores in eastern China<sup>19</sup> showed similar historical profiles for soot but different ones for char, which further confirms the different transport modes of char and soot. The sedimentary soot profiles<sup>19</sup> well reflect the industrialization history of China, showing an abrupt increase in the late 1970s, the timing of opening and economic reform of China. The stronger association of PAHs with soot than with char in soils and sediments in the Guanzhong Basin in China<sup>33</sup> is consistent with the results of the previous SRM test that showed a higher absorption

capacity of PAHs by soot than by char<sup>34</sup>. The Holocene char and soot records reconstructed from Lake Daihai reflected the paleo-wildfire occurrence and they showed good correlations with climate changes and human activities<sup>29</sup>.

In recent years, brown carbon (BrC) has received increasing attention as a type of carbonaceous aerosol which also absorbs light<sup>35</sup>. The light-absorbing characteristics of BrC<sup>35</sup> and char<sup>24</sup> both are specific for certain wavelengths of the light spectrum, and their light absorption is weaker than that of soot. BrC and char are distinctively different. Char (or charcoal) particles are combustion residues that are inert and can exist in the environment millions of years<sup>36</sup>, whereas BrC is water soluble and considerably more labile. Quantification methods of BrC and char are different. Char is operationally measured as the carbon that remains after chemical or thermal pretreatment<sup>12, 37-39</sup>, whereas BrC is measured as the carbon extractable by water or organic solvents<sup>35, 40, 41</sup>.

#### **S1.4. PAHs, OPAHs and AZAs analyses**

Concentration of 29 parent- and alkyl-PAHs, 15 OPAHs and 4 azaarenes (AZAs) were determined. A mixture of 7 deuterated PAHs and 2 deuterated OPAHs were used as internal standard to quantify parent-/alkyl-PAHs and carbonyl-OPAHs, respectively. A detailed description of the analytical procedure for the measurement is given by Bandowe and Wilcke<sup>42, 43</sup>. Briefly, about 2 g of sediment sample, 25 µL of each of the deuterated OPAHs and PAHs mixtures were added as internal standards to the accelerated solvent extractor (ASE) cell. Samples were extracted using ASE 200 (Dionex, Sunnyvale, CA, USA) with dichloromethane in a first extraction cycle, and

157 with  $\text{CH}_3\text{COCH}_3/\text{CH}_2\text{Cl}_2/\text{CF}_3\text{COOH}$  (1%) (250:125:1 v/v/v) in a second extraction  
158 cycle. The two extracts of each sample were combined, dried on  $\text{Na}_2\text{SO}_4$ , and cleaned  
159 up/fractionated on silica gel (10% deactivated) columns. The PAHs fraction was  
160 eluted with 15 mL hexane/dichloromethane (5:1 v/v), followed by 8 mL  
161 dichloromethane and 5 mL acetone to elute OPAHs and AZAs. The PAHs and OPAHs  
162 + AZAs fractions were rotary evaporated to about 0.5 mL, transferred to a 2 mL GC  
163 vial, spiked with 25  $\mu\text{L}$  (22  $\mu\text{g}/\text{mL}$ ) fluoranthene- $\text{D}_{10}$  as recovery standard, put in the  
164 refrigerator and followed by GC/MS measurement.

165 An Agilent 7890A gas chromatograph coupled to an Agilent 5975C mass  
166 spectrometer in EI and SIM mode was used for measurements. The GC Oven program  
167 for PAHs, OPAHs, and AZAs was the same as in previous papers<sup>43, 44</sup>. All data  
168 recording and processing was done with the Agilent MSD ChemStation software  
169 package.

170 Target compounds were quantified by the internal standard technique using  
171 seven calibration standards prepared from target compound standards each spiked  
172 with a constant concentration of internal standard. IBM SPSS 19.0 for Windows and  
173 Origin 8.5 were used for statistical analysis and graphics.

### 174 **S1.5. Quality assurance and quality control**

175 All glassware was rinsed with acetone, machine-washed, baked at 250 °C for  
176 12 h, and rinsed with high purity solvents before use. All solvents used for extraction,  
177 column chromatography, and standard preparation were high purity for pesticide  
178 residue analysis. To check and correct for possible contaminations during the



179 analytical procedure, we processed blanks made of diatomaceous earth at the  
180 beginning of each batch of 24 samples. Most compounds were either not detected in  
181 the blanks or were measured in negligible quantities, significantly below those found  
182 in the samples. The measured compound concentrations in the samples were corrected  
183 by subtracting the mean blank concentrations. We checked the accuracy of PAH  
184 measurements by including the certified reference material ERM-CC013a (BAM,  
185 Berlin, Germany) into our analyses. The mean recovery of all PAHs for which  
186 certified values were provided was 110%. We checked the recovery of all internal  
187 standards. The mean recovery of deuterated PAHs and OPAHs was 80% (67-88%).  
188 All concentrations are reported without recovery correction.

189

## References

1. Jin, Z.; Han, Y.; Chen, L., Past atmospheric Pb deposition in Lake Qinghai, northeastern Tibetan Plateau. *J. Paleolimnol.* **2010**, 43, (3), 551-563.
2. Xu, H.; Ai, L.; Tan, L.; An, Z., Geochronology of a surface core in the northern basin of Lake Qinghai: evidence from <sup>210</sup>Pb and <sup>137</sup>Cs radionuclides. *Chinese J. Geochem.* **2006**, 25, 301-306.
3. Han, Y. M.; Cao, J. J.; Kenna, T. C.; Yan, B. Z.; Jin, Z. D.; Wu, F.; An, Z. S., Distribution and ecotoxicological significance of trace element contamination in a similar to 150 yr record of sediments in Lake Chaohu, Eastern China. *J. Environ. Monitor.* **2011**, 13, (3), 743-752.
4. Henderson, A. C. G.; Holmes, J. A.; Zhang, J.; Leng, M. J.; Carvalho, L. R., A carbon-and oxygen-isotope record of recent environmental change from Qinghai Lake, NE Tibetan Plateau. *Chinese Science Bulletin* **2003**, 48, (14), 1463-1468.
5. Shen, J.; Zhang, E.; Xia, W., Records from lake sediments of Lake Qinghai to mirror climatic and environmental changes of the past about 1000 years. *Quaternary Sciences* **2001**, 21, 508-513.
6. Hilton, J.; Lishman, J. P.; Allen, P. V., The Dominant Processes of Sediment Distribution and Focusing in a Small, Eutrophic, Monomictic Lake. *Limnology and Oceanography* **1986**, 31, (1), 125-133.
7. Appleby, P., Chronostratigraphic techniques in recent sediments. In *Tracking environmental change using lake sediments*, Last, W. M.; Smol, J. P., Eds. Springer: 2001; pp 171-203.
8. Appleby, P. G., Three decades of dating recent sediments by fallout radionuclides: a review. *Holocene* **2008**, 18, (1), 83-93.
9. von Gunten, L.; Grosjean, M.; Beer, J.; Grob, P.; Morales, A.; Urrutia, R., Age modeling of young non-varved lake sediments: methods and limits. Examples from two lakes in Central Chile. *J. Paleolimnol.* **2009**, 42, (3), 401-412.
10. Han, Y. N.; Cao, J. J.; An, Z. S.; Chow, J. C.; Watson, J. G.; Jin, Z.; Fung, K.; Liu, S. X., Evaluation of the thermal/optical reflectance method for quantification of elemental carbon in sediments. *Chemosphere* **2007**, 69, 526-533.
11. Han, Y. M.; Cao, J. J.; Posmentier, E. S.; Chow, J. C.; Watson, J. G.; Fung, K. K.; Jin, Z. D.; Liu, S. X.; An, Z. S., The effect of acidification on the determination of elemental carbon, char-, and soot-elemental carbon in soils and sediments. *Chemosphere* **2009**, 75, (1), 92-99.
12. Han, Y. M.; Cao, J. J.; Chow, J. C.; Watson, J. G.; An, Z. S.; Jin, Z. D.; Fung, K. C.; Liu, S. X., Evaluation of the thermal/optical reflectance method for discrimination between char- and soot-EC. *Chemosphere* **2007**, 69, 569-574.
13. Hammes, K.; Schmidt, M. W. I.; Smernik, R. J.; Currie, L. A.; Ball, W. P.; Nguyen, T. H.; Louchouart, P.; Houel, S.; Gustafsson, O.; Elmquist, M.; Cornelissen, G.; Skjemstad, J. O.; Masiello, C. A.; Song, J.; Peng, P. a.; Mitra, S.; Dunn, J. C.; Hatcher, P. G.; Hockaday, W. C.; Smith, D. M.; Hartkopf-Froeder, C.; Boehmer, A.; Lueer, B.; Huebert, B. J.; Amelung, W.; Brodowski, S.; Huang, L.; Zhang, W.; Gschwend, P. M.; Flores-Cervantes, D. X.; Irga, C.; Rouzaud, J.-N.; Rumpel, C.; Guggenberger, G.; Kaiser, K.; Rodionov, A.; Gonzalez-Vila, F. J.; Gonzalez-Perez, J. A.; de la Rosa, J. M.; Manning, D. A. C.; Lopez-Capel, E.; Ding, L., Comparison of quantification methods to measure fire-derived (black/elemental) carbon in soils and sediments using reference materials from soil, water, sediment and the atmosphere. *Global Biogeochem. Cycles* **2007**, 21, (3), DOI: 10.1029/2006GB002914.
14. Schmidt, M. W. I.; Skjemstad, J. O.; Czimeczik, C. I.; Glaser, B.; Prentice, K. M.; Gelinas, Y.; Kuhlbusch, T. A. J., Comparative analysis of black carbon in soils. *Global Biogeochem. Cycles* **2001**,

15, (1), 163-167.

15. Watson, J. G.; Chow, J. C.; Chen, L.-W. A., Summary of organic and elemental carbon/black carbon analysis methods and intercomparisons. *J. Aero. Air Qual. Res.* **2005**, 5, 65-102.

16. Chow, J. C.; Watson, J. G.; Pritchett, L. C.; Pierson, W. R.; Frazier, C. A.; Purcell, R. G., The direct thermal/optical reflectance carbon analysis system: description, evaluation and applications in U.S. Air quality studies. *Atmospheric Environment. Part A. General Topics* **1993**, 27, (8), 1185-1201.

17. Husain, L.; Khan, A. J.; Ahmed, T.; Swami, K.; Bari, A.; Webber, J. S.; Li, J., Trends in atmospheric elemental carbon concentrations from 1835 to 2005. *J. Geophys. Res.* **2008**, 113, (D13), doi:10.1029/2007JD009398.

18. Han, Y.; Chen, A.; Cao, J.; Fung, K.; Ho, F.; Yan, B.; Zhan, C.; Liu, S.; Wei, C.; An, Z., Thermal/Optical Methods for Elemental Carbon Quantification in Soils and Urban Dusts: Equivalence of Different Analysis Protocols. *Plos One* **2013**, 8, (12), Doi:10.1371/journal.pone.0083462.

19. Han, Y. M.; Cao, J. J.; Yan, B. Z.; Kenna, T. C.; Jin, Z. D.; Cheng, Y.; An, Z. S., Comparison of elemental carbon in lake sediments measured by TOR, TOT and CTO methods and 150-year pollution history in Eastern China. *Environ. Sci. Technol.* **2011**, 45, (12), 5287-5293.

20. Gustafsson, O.; Gschwend, P. M., Soot as a strong partition medium for polycyclic aromatic hydrocarbons in aquatic systems. In *Molecular Markers in Environmental Geochemistry*, 1997; Vol. 671, pp 365-381.

21. Elmquist, M.; Cornelissen, G.; Kukulska, Z.; Gustafsson, O., Distinct oxidative stabilities of char versus soot black carbon: Implications for quantification and environmental recalcitrance. *Global Biogeochem. Cycles* **2006**, 20, GB2009, doi:10.1029/2005GB002629.

22. Nguyen, T. H.; Brown, R. A.; Ball, W. P., An evaluation of thermal resistance as a measure of black carbon content in diesel soot, wood char, and sediment. *Org. Geochem.* **2004**, 35, (3), 217-234.

23. Han, Y. M.; Han, Z. W.; Cao, J. J.; Chow, J. C.; Watson, J. G.; An, Z. S.; Liu, S. X.; Zhang, R. J., Distribution and origin of carbonaceous aerosol over a rural high-mountain lake area, Northern China and its transport significance. *Atmos. Environ.* **2008**, 42, (10), 2405-2414.

24. Han, Y. M.; Cao, J. J.; Lee, S. C.; Ho, K. F.; An, Z. S., Different characteristics of char and soot in the atmosphere and their ratio as an indicator for source identification in Xi'an, China. *Atmos. Chem. Phys.* **2010**, 10, (2), 595-607.

25. Kim, K. H.; Sekiguchi, K.; Furuuchi, M.; Sakamoto, K., Seasonal variation of carbonaceous and ionic components in ultrafine and fine particles in an urban area of Japan. *Atmos. Environ.* **2011**, 45, (8), 1581-1590.

26. Lim, S.; Lee, M.; Lee, G.; Kim, S.; Yoon, S.; Kang, K., Ionic and carbonaceous compositions of PM<sub>10</sub>, PM<sub>2.5</sub> and PM<sub>1.0</sub> at Gosan ABC Superstation and their ratios as source signature. *Atmos. Chem. Phys.* **2012**, 12, (4), 2007-2024.

27. Jeong, C.-H.; Herod, D.; Dabek-Zlotorzynska, E.; Ding, L.; McGuire, M. L.; Evans, G., Identification of the Sources and Geographic Origins of Black Carbon using Factor Analysis at Paired Rural and Urban sites. *Environ. Sci. Technol.* **2013**, 47, (15), 8462-8470.

28. Minoura, H.; Morikawa, T.; Mizohata, A.; Sakamoto, K., Carbonaceous aerosol and its characteristics observed in Tokyo and south Kanto region. *Atmos. Environ.* **2012**, 61, 605-613.

29. Han, Y. M.; Marlon, J.; Cao, J. J.; Jin, Z. D.; An, Z. S., Holocene linkages between char, soot, biomass burning and climate from Lake Daihai, China. *Global Biogeochem. Cycles* **2012**, 26, doi:10.1029/2012GB004413.

30. Cong, Z.; Kang, S.; Gao, S.; Zhang, Y.; Li, Q.; Kawamura, K., Historical Trends of Atmospheric

- Black Carbon on Tibetan Plateau As Reconstructed from a 150-Year Lake Sediment Record. *Environ. Sci. Technol.* **2013**, 47, (6), 2579-2586.
31. Han, Y. M.; Lee, S. C.; Cao, J. J.; Ho, K. F.; An, Z. S., Spatial distribution and seasonal variation of char-EC and soot-EC in the atmosphere over China. *Atmos. Environ.* **2009**, 43, (38), 6066-6073.
32. Masiello, C. A., New directions in black carbon organic geochemistry. *Mar. Chem.* **2004**, 92, (1-4), 201-213.
33. Han, Y. M.; Bandowe, B. A. M.; Wei, C.; Cao, J. J.; Wilcke, W.; Wang, G. H.; Ni, H. Y.; Jin, Z. D.; An, Z. S.; Yan, B. Z., Stronger association of polycyclic aromatic hydrocarbons with soot than with char in soils and sediments. *Chemosphere* **2015**, 119, 1335-1345.
34. Cornelissen, G.; Gustafsson, O.; Bucheli, T. D.; Jonker, M. T. O.; Koelmans, A. A.; Van Noort, P. C. M., Extensive sorption of organic compounds to black carbon, coal, and kerogen in sediments and soils: Mechanisms and consequences for distribution, bioaccumulation, and biodegradation. *Environ. Sci. Technol.* **2005**, 39, (18), 6881-6895.
35. Andreae, M. O.; Gelencser, A., Black carbon or brown carbon? The nature of light-absorbing carbonaceous aerosols. *Atmos. Chem. Phys.* **2006**, 6, 3131-3148.
36. Scott, A. C.; Glasspool, I. J., The diversification of Paleozoic fire systems and fluctuations in atmospheric oxygen concentration. *Proc. Natl. Acad. Sci.* **2006**, 103, (29), 10861-10865.
37. Lim, B.; Cachier, H., Determination of black carbon by chemical oxidation and thermal treatment in recent marine and lake sediments and Cretaceous-Tertiary clays. *Chem. Geol.* **1996**, 131, (1-4), 143-154.
38. Masiello, C. A.; Druffel, E. R. M., Black carbon in deep-sea sediments. *Science* **1998**, 280, (5371), 1911-1913.
39. Bird, M. I.; Grocke, D. R., Determination of the abundance and carbon isotope composition of elemental carbon in sediments. *Geochim. Cosmochim. Acta* **1997**, 61, (16), 3413-3423.
40. Lukacs, H.; Gelencser, A.; Hammer, S.; Puxbaum, H.; Pio, C.; Legrand, M.; Kasper-Giebl, A.; Handler, M.; Limbeck, A.; Simpson, D.; Preunkert, S., Seasonal trends and possible sources of brown carbon based on 2-year aerosol measurements at six sites in Europe. *J. Geophys. Res.* **2007**, 112, (D23), DOI: 10.1029/2006JD008151.
41. Graber, E. R.; Rudich, Y., Atmospheric HULIS: How humic-like are they? A comprehensive and critical review. *Atmos. Chem. Phys.* **2006**, 6, 729-753.
42. Bandowe, B. A. M.; Wilcke, W., Analysis of Polycyclic Aromatic Hydrocarbons and Their Oxygen-Containing Derivatives and Metabolites in Soils. *Journal of Environmental Quality* **2010**, 39, (4), 1349-1358.
43. Bandowe, B. A. M.; Sobocka, J.; Wilcke, W., Oxygen-containing polycyclic aromatic hydrocarbons (OPAHs) in urban soils of Bratislava, Slovakia: Patterns, relation to PAHs and vertical distribution. *Environ. Pollut.* **2011**, 159, (2), 539-549.
44. Bandowe, B. A. M.; Shukurov, N.; Kersten, M.; Wilcke, W., Polycyclic aromatic hydrocarbons (PAHs) and their oxygen-containing derivatives (OPAHs) in soils from the Angren industrial area, Uzbekistan. *Environ. Pollut.* **2010**, 158, (9), 2888-2899.

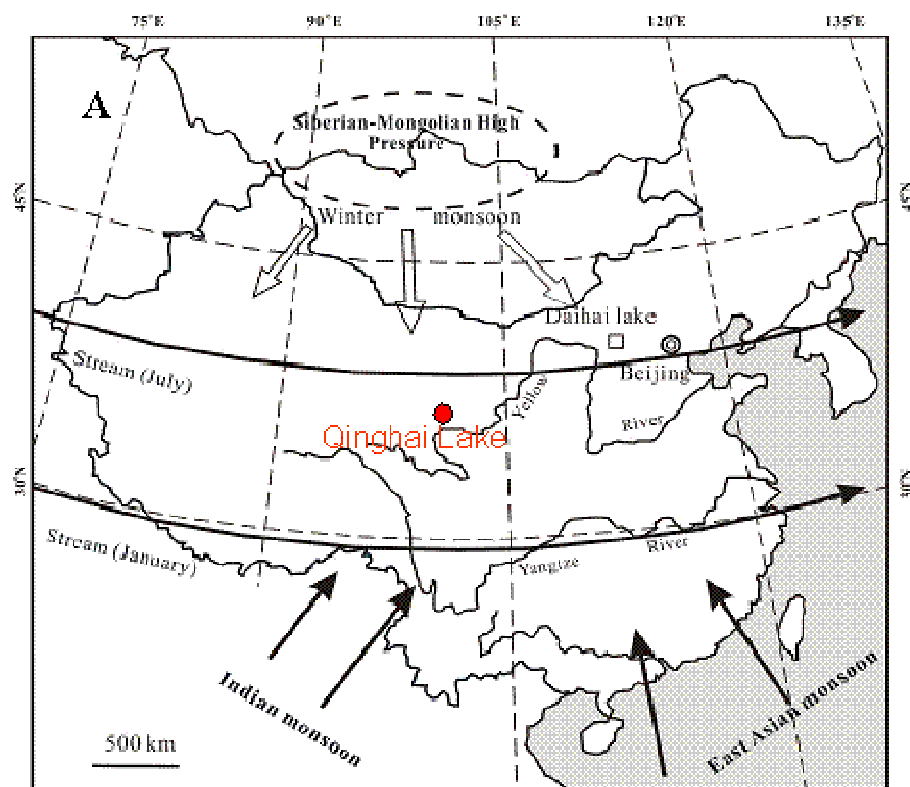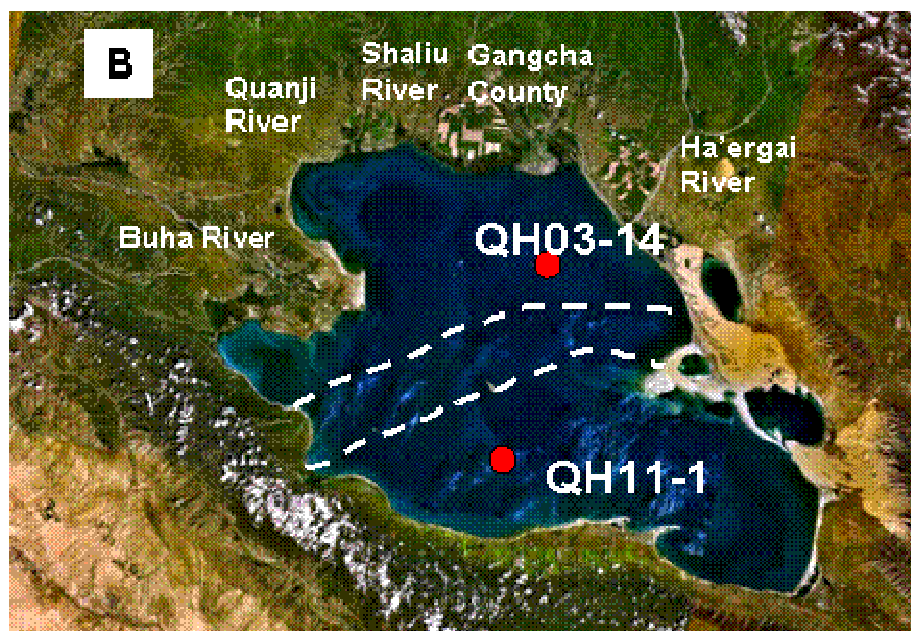

**Fig. S1.** (A) Climatic systems of China, including the East Asian and Indian summer monsoons, the Siberian–Mongolian High, and the Westerlies. (B) Location of the sediment cores QH03-14 and QH11-1 obtained from different sub-basins of Lake Qinghai.

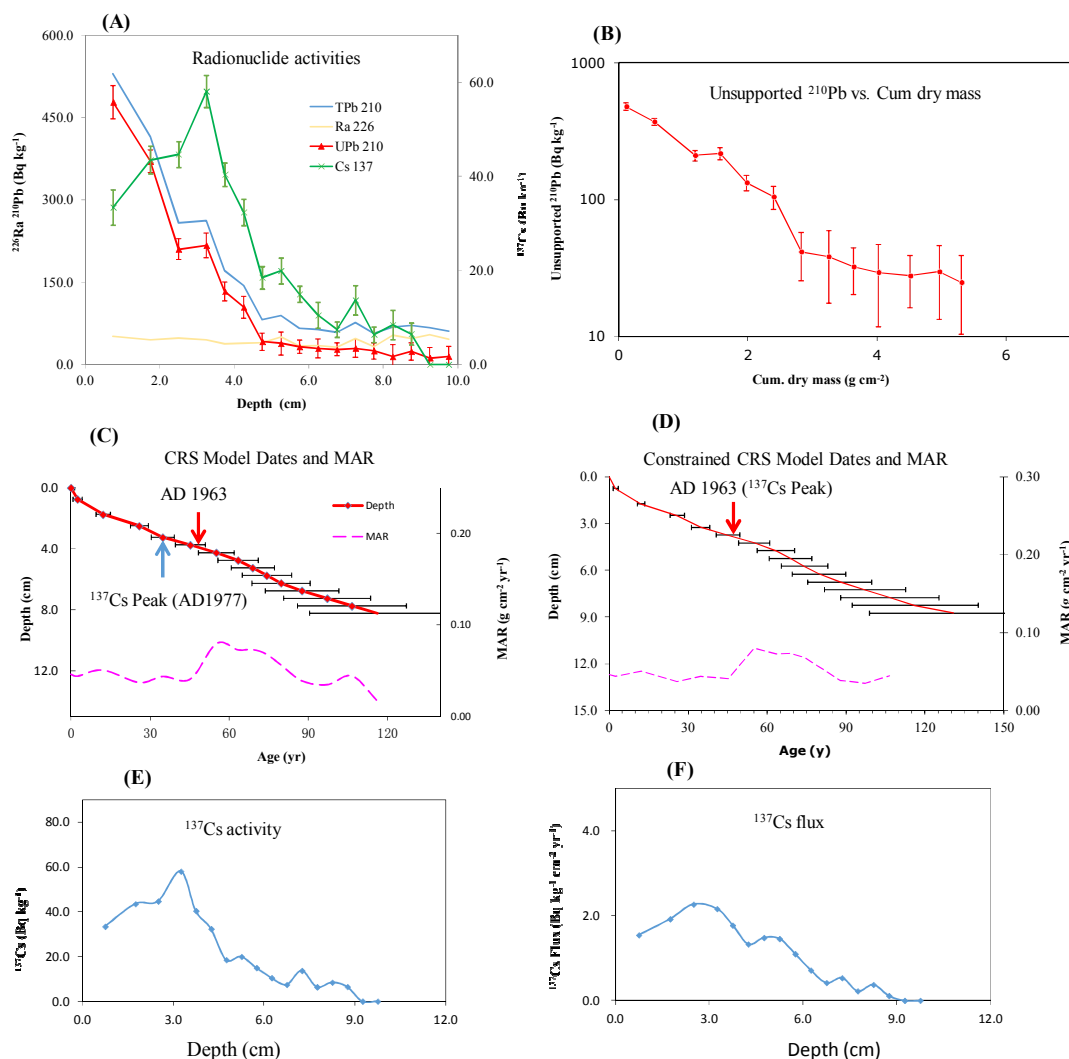

326

327

328

329

330

331

332

333

334

335

336

**Fig. S2. Chronology reconstruction of core QH11-1 using the constant rate of supply (CRS)  $^{210}\text{Pb}$  model.** (A) Measured Pb, Cs, and Ra activities, including total  $^{210}\text{Pb}$  (blue line), excess  $^{210}\text{Pb}$  (red line with error bars),  $^{226}\text{Ra}$  (cyan line), and  $^{137}\text{Cs}$  (green line with error bars) concentrations along with depth variation; (B) Excess  $^{210}\text{Pb}$  against cumulative mass; (C) CSR model dates and corresponding mass accumulation rate (MAR), which show that  $^{137}\text{Cs}$  peak at 3.25 sediment depth occurs at  $\sim 1977$ ; (D) Constrained (3.75 cm through 1963) CRS model dates and corresponding MAR; (E)  $^{137}\text{Cs}$  peak vs. depth presenting one  $^{137}\text{Cs}$  peak; (F)  $^{137}\text{Cs}$  flux calculated using the CRS model vs. depth presenting that the shape of the  $^{137}\text{Cs}$  peak is broad.

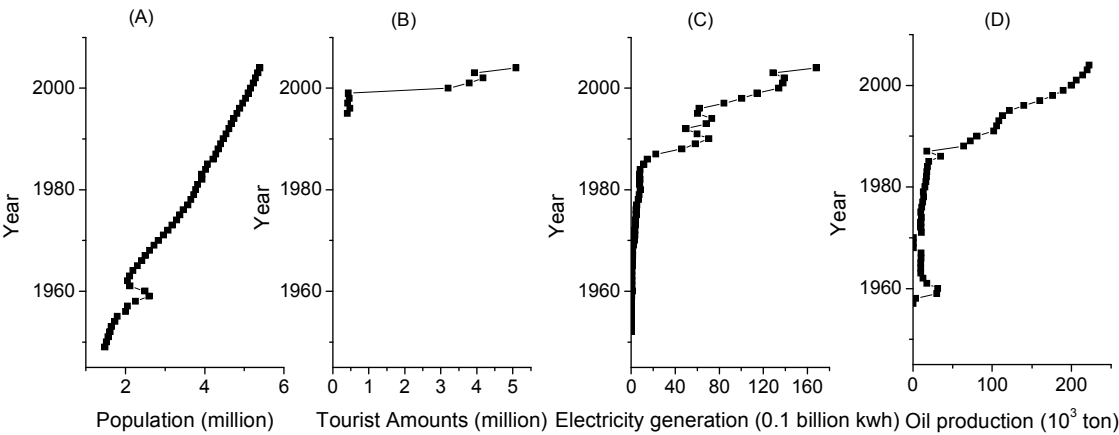

338

339 **Fig. S3.** History of the population numbers, number of tourists, extents of electricity  
340 generation and oil production (or consumption) in Qinghai Province in the past 60  
341 years. Tourism in Qinghai Province is mainly driven by in the attractions around Lake  
342 Qinghai.

343

344

345  
346

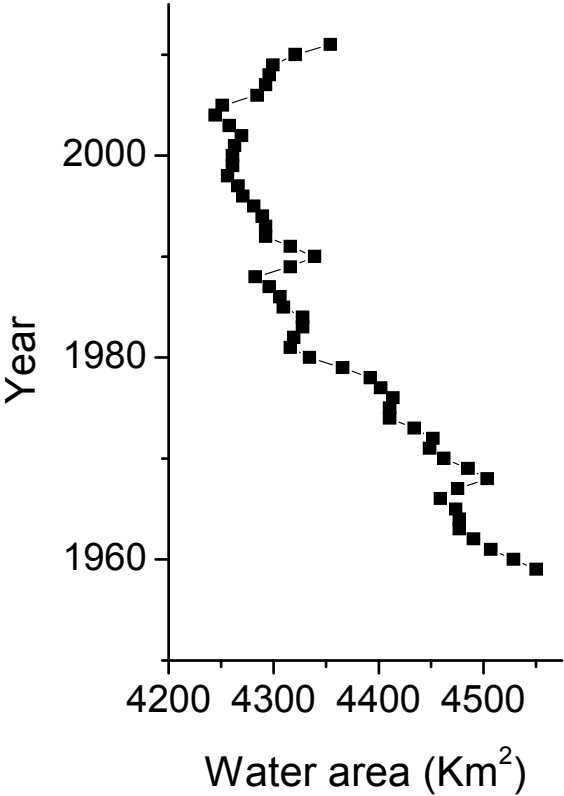

347  
348 **Fig. S4.** History of the surface size of Lake Qinghai in the past 50 years.  
349



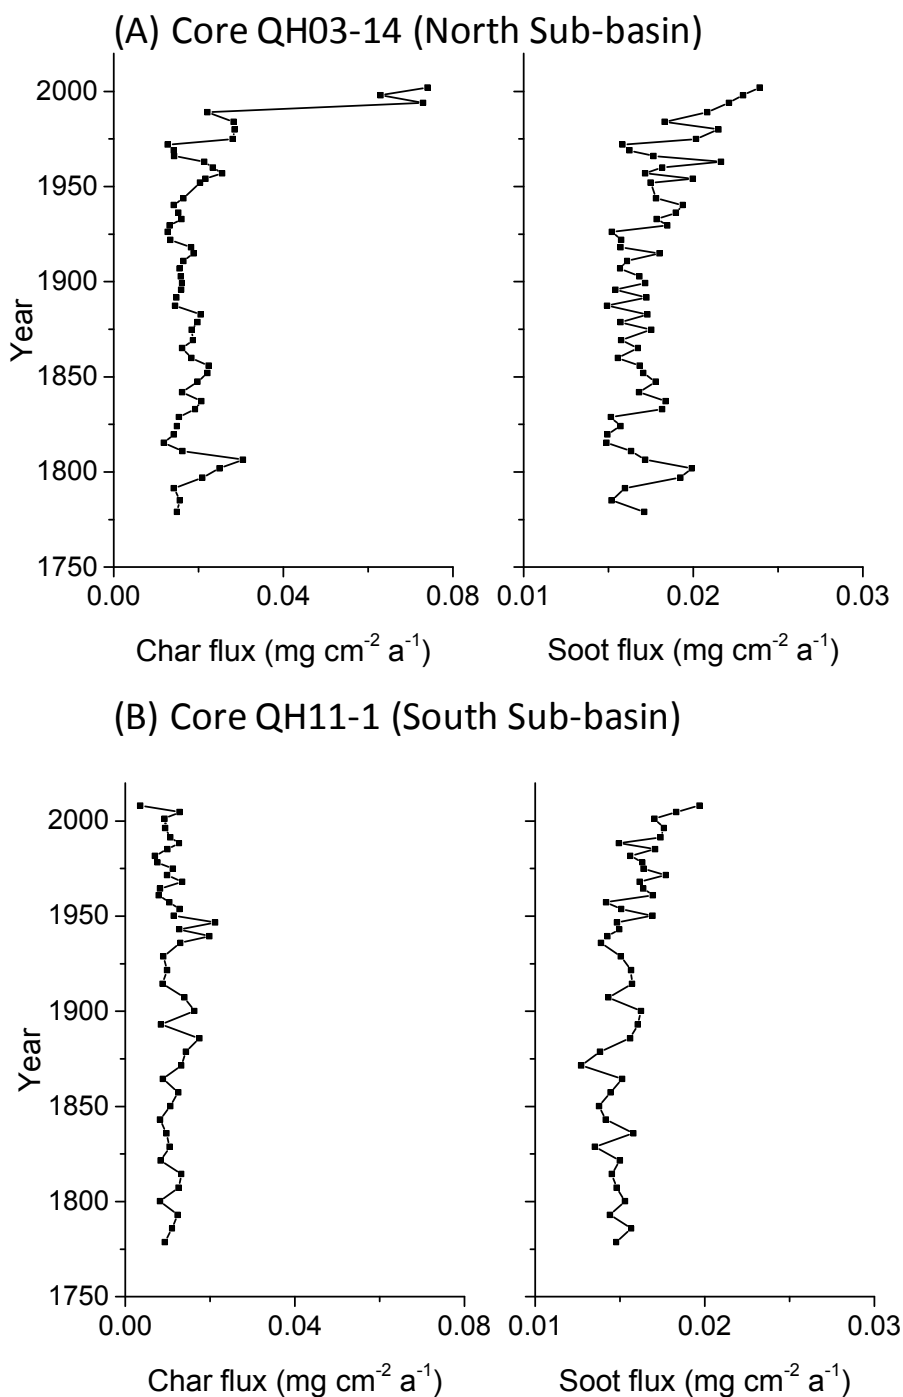

**Fig. S5.** Historical profiles of char and soot fluxes in (A) sediment core QH03-14 (northern sub-basin with more human inputs) and (B) sediment core QH11-1 (southern sub-basin).

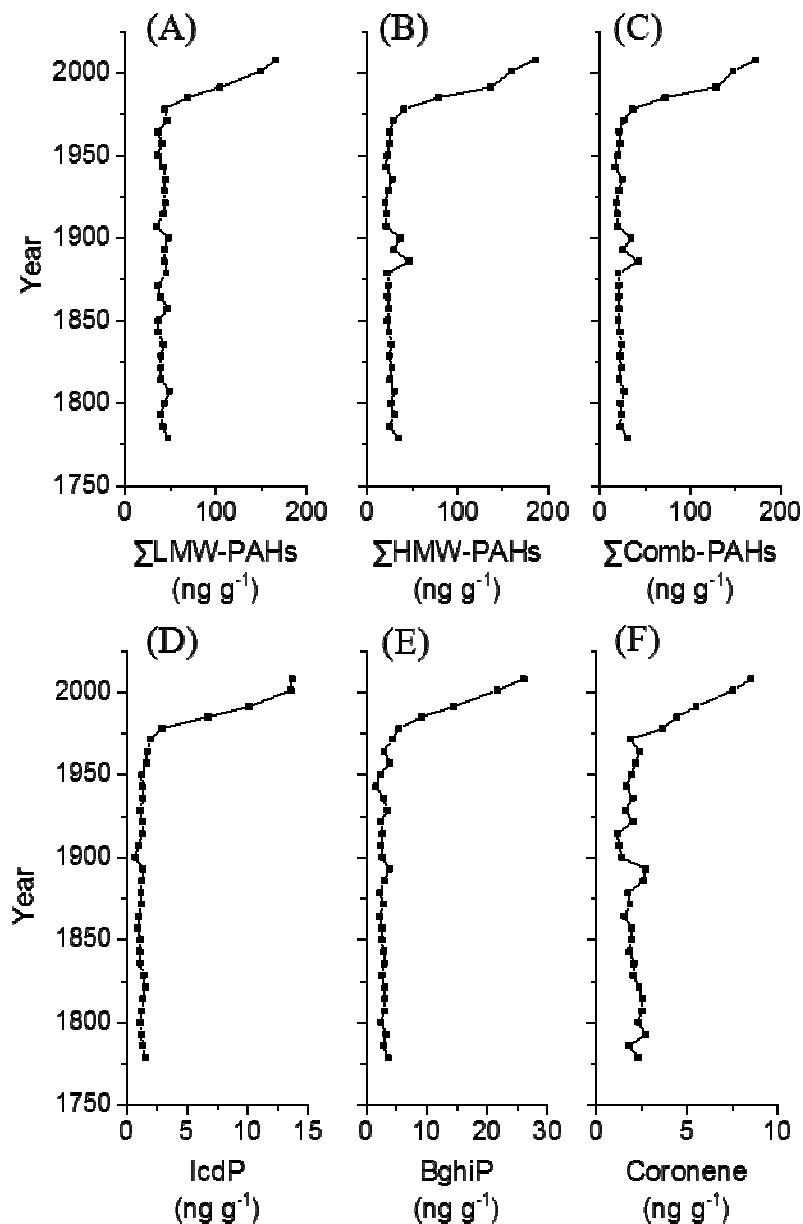

356

357 **Fig. S6.** Vertical distribution of the concentrations (ng g<sup>-1</sup>) of (A)  $\Sigma$ LMW-PAHs; (B)  
 358  $\Sigma$ HMW-PAHs; (C)  $\Sigma$ COMB-PAHs; (D) IcdP (indeno[c,d]pyrene); (E) BghiP  
 359 (benzo[g,h,i]perylene; and (F) Coronene. See main text and Table S1 for the definition  
 360 of abbreviations.

361

362

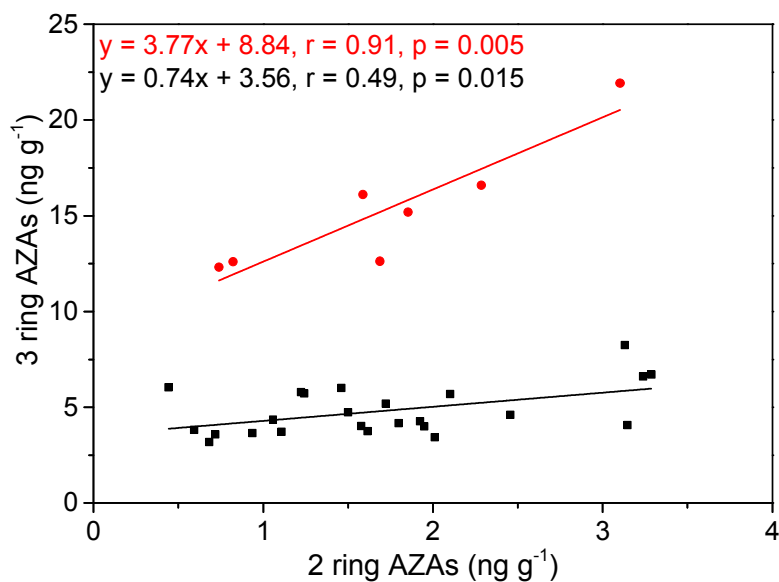

364

365

366

367

368

369

370

371

372

373

**Fig. S7.** Relationship between the concentrations of 2-ring and 3-ring azaarenes (AZAs) in sediments of Lake Qinghai before (dark squares) and after (red circles) the 1960s. The considered 2-ring azaarene is quinoline, while 3-ring azaarenes include benzo[h]quinoline, acridine and carbazole.

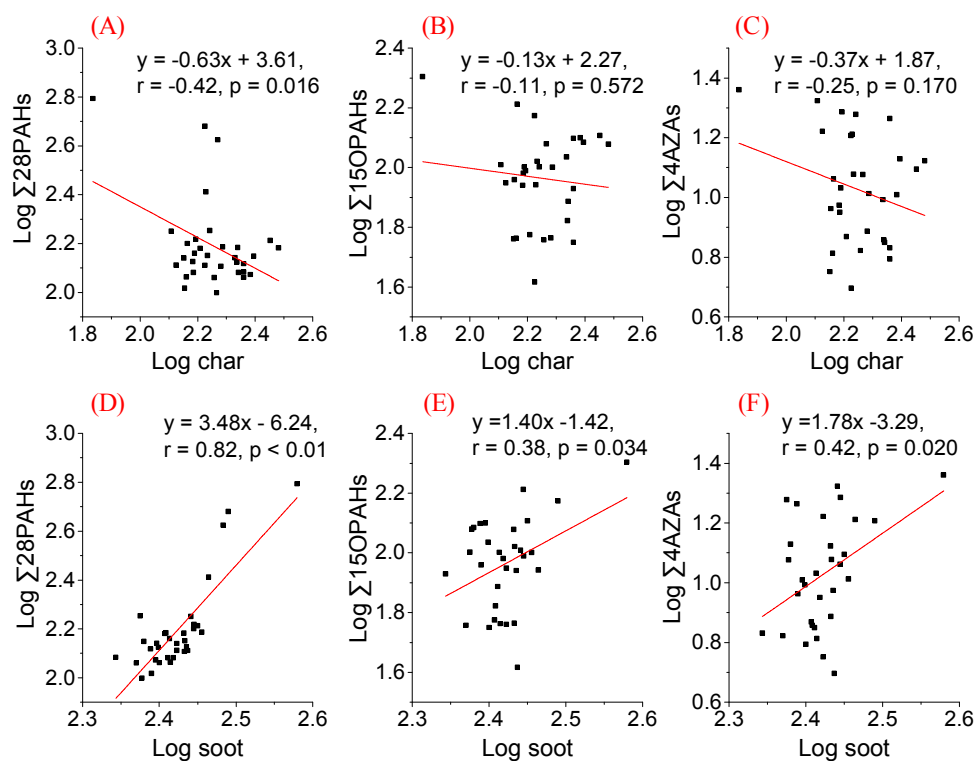

**Fig. S8.** Relationships between the concentrations of (A)  $\Sigma 28\text{PAHs}$  (total measured PAHs without perylene) vs char, (B)  $\Sigma 15\text{OPAHs}$  vs char, (C)  $\Sigma 4\text{AZAs}$  vs char, (D)  $\Sigma 28\text{PAHs}$  vs soot, (E)  $\Sigma 15\text{OPAHs}$  vs soot, and (F)  $\Sigma 4\text{AZAs}$  vs soot. Concentrations of PAHs, OPAHs, AZAs ( $\text{ng g}^{-1}$ ) and char, soot ( $\text{mg g}^{-1}$ ) are log-transferred.

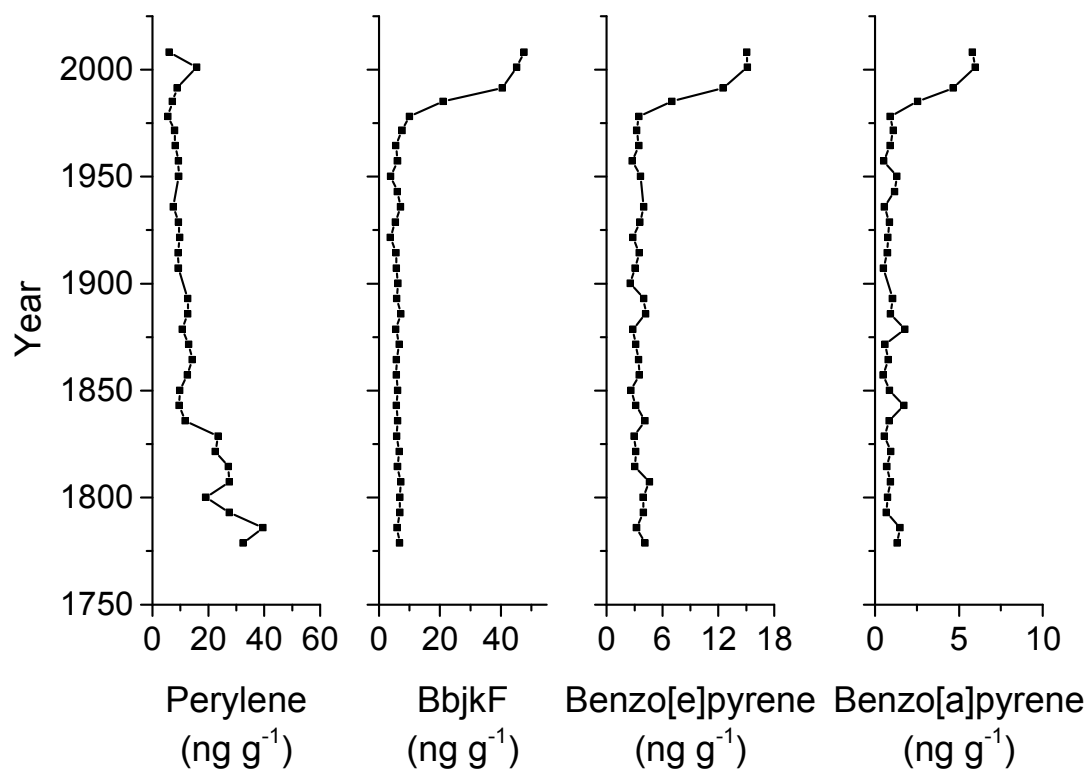

384

385

386

387

388

389

390

391

392

**Fig S9.** Vertical distribution of the concentrations of (A) perylene and its combustion-derived isomers (MW = 252) such as (B) benzo[b+j+k]fluoranthene (BbjkF), (C) benzo[e]pyrene and (D) benzo[a]pyrene in the sediment core QH11-1 of Lake Qinghai. benzo[b+j+k]fluoranthene is sum of benzo[b]fluoranthene, benzo[j]fluoranthene and benzo[k]fluoranthene.

393  
394

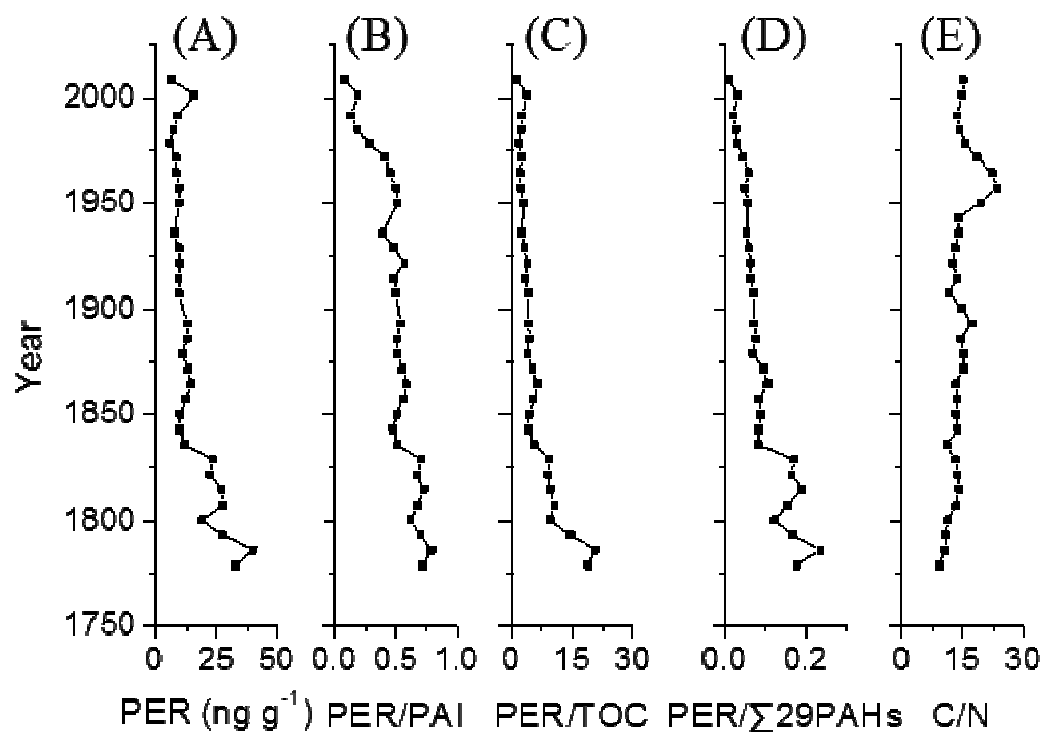

395  
396  
397  
398  
399  
400  
401  
402  
403

**Fig. S10.** (A) Perylene (PER) concentrations, and concentration ratios of (B) PER to its penta-aromatic isomers (PER/PAI), (C) concentration ratio of PER/total organic carbon (TOC), (D) concentration ratio of PER/sum of 29 PAHs ( $\Sigma$ 29PAHs, including perylene), and of (E) TOC to total nitrogen concentrations (C/N) in Lake Qinghai.

404  
405 **Table S1.** Statistical description concentrations of PACs, sum of concentrations of  
406 PACs and other sediment properties.

|                                  | Abbreviation | Minimum | Maximum | Average | Max/Min |
|----------------------------------|--------------|---------|---------|---------|---------|
| azaarenes                        | AZAs         |         |         |         |         |
| Quinoline                        | QUI          | 0.44    | 3.29    | 1.71    | 7.4     |
| Benzo[h]quinoline                | BhQ          | 0.48    | 13.2    | 3.51    | 27.7    |
| Acridine                         | ACR          | 0.57    | 5.73    | 1.11    | 10.1    |
| Carbazole                        | CAR          | 1.81    | 3.84    | 2.57    | 2.1     |
| Oxygenated PAHs                  | OPAHs        |         |         |         |         |
| 1-Indanone                       | 1-IND        | 1.02    | 10.2    | 4.55    | 9.9     |
| 1,4-Naphthoquinone               | 1,4-NQ       | 1.20    | 33.7    | 11.7    | 28.2    |
| 1-Naphthaldehyde                 | 1-NALD       | 0.67    | 3.42    | 1.81    | 5.1     |
| 2-Biphenylcarboxaldehyde         | 2-BPCA       | 0.11    | 7.64    | 1.98    | 71.4    |
| 9-Fluorenone                     | 9-FLU        | 4.69    | 20.0    | 10.4    | 4.3     |
| 1,2-Acenaphthenequinone          | 1,2-ACEQ     | 7.35    | 64.0    | 17.8    | 8.7     |
| 9,10-Anthraquinone               | 9,10-AQ      | 9.71    | 43.1    | 15.8    | 4.4     |
| 1,8-Naphtalic anhydride          | 1,8-NA       | 1.06    | 38.5    | 7.69    | 36.4    |
| 2-Meth-9,10-anthraquinone        | 2-MAQ        | 4.82    | 24.2    | 12.4    | 5.0     |
| Benzo[a]florenone                | BAFLU        | 2.29    | 37.1    | 8.89    | 16.2    |
| 7H-Benzo[d,e]anthracen-7-one     | BdeAQ        | 0.93    | 10.74   | 3.43    | 11.6    |
| Benzo[a]anthracene-7,12-dione    | BaAQ         | 0.41    | 8.24    | 2.22    | 20.0    |
| 5,12-Naphthacenequinone          | 5,12-NQ      | 0.01    | 1.86    | 0.77    | 329     |
| 6H-Benzo[c,d]pyren-6-one         | BcdPQ        | 0.13    | 14.7    | 3.00    | 112     |
| Polycyclic aromatic hydrocarbons | PAHs         |         |         |         |         |
| 1,2,3,4-Tetrahydronaphthalene    | TH-NAPH      | 0.91    | 10.3    | 2.04    | 11.3    |
| Naphthalene                      | NAPH         | 10.1    | 72.7    | 17.9    | 7.2     |
| 2-Methylnaphthalene              | 2-MNAPH      | 3.36    | 19.3    | 7.58    | 5.7     |
| 1-Methylnaphthalene              | 1-MNAPH      | 5.22    | 31.7    | 14.0    | 6.1     |
| Biphenyl                         | BIPH         | 7.37    | 33.2    | 11.5    | 4.5     |
| 1,3-Dimethylnaphthalene          | 1,3-DMNAPH   | 9.25    | 68.5    | 22.4    | 7.4     |
| Acenaphthylene                   | ACEY         | 0.32    | 2.29    | 0.65    | 7.1     |
| Acenaphthene                     | ACEN         | 0.33    | 6.02    | 1.57    | 18.3    |
| Fluorene                         | FLUO         | 2.18    | 17.5    | 3.78    | 8.0     |
| Phenanthrene                     | PHE          | 14.8    | 81.6    | 23.9    | 5.5     |
| Anthracene                       | ANT          | 1.82    | 14.9    | 3.48    | 8.2     |
| 2-Methylphenanthrene             | 2-MPHE       | 2.24    | 40.7    | 10.8    | 18.2    |
| 3,6-Dimethylphenanthrene         | 3,6-DMPHE    | 0.57    | 5.88    | 1.28    | 10.2    |
| Fluoranthene                     | FLUA         | 0.71    | 13.0    | 2.52    | 18.3    |
| Pyrene                           | PYR          | 2.09    | 25.9    | 4.95    | 12.4    |
| Retene                           | RET          | 2.07    | 60.7    | 9.34    | 29.3    |
| Benzo[a]anthracene               | BaA          | 0.72    | 9.78    | 1.94    | 13.6    |
| Chrysene+Triphenylene            | CHR          | 1.61    | 20.7    | 3.77    | 12.8    |

|                                                    |                  |       |       |       |      |
|----------------------------------------------------|------------------|-------|-------|-------|------|
| Benzo[b+j+k]fluoranthene                           | BbjkF            | 3.76  | 47.7  | 10.2  | 12.7 |
| Benzo[e]pyrene                                     | BeP              | 2.55  | 15.1  | 4.56  | 5.9  |
| Benzo[a]pyrene                                     | BaP              | 0.49  | 14.6  | 1.80  | 30.1 |
| Perylene                                           | PER              | 5.55  | 39.5  | 14.5  | 7.1  |
| Indeno [1,2,3-cd]pyrene                            | IcdP             | 0.73  | 13.7  | 2.50  | 18.7 |
| Dibenzo[a,h]anthracene                             | DahA             | 0.47  | 4.84  | 1.35  | 10.4 |
| Benzo[g,h,i]perylene                               | BghiP            | 1.58  | 26.0  | 4.79  | 16.5 |
| Coronene                                           | COR              | 1.17  | 8.53  | 2.62  | 7.3  |
| Sum of azaarenes                                   | $\Sigma 4AZAs$   | 4.97  | 23.0  | 11.6  | 4.6  |
| Sum of oxygen-containing PAHs                      | $\Sigma 15OPAHs$ | 41.4  | 201.5 | 98.0  | 4.9  |
| Sum of parent polycyclic aromatic hydrocarbons     | $\Sigma 29PAHs$  | 109.3 | 628.4 | 188.0 | 5.7  |
| $\Sigma PAHs$ without perylene                     | $\Sigma 28PAHs$  | 99.6  | 622.3 | 174.4 | 6.2  |
| $\Sigma 15OPAHs / \Sigma 28PAHs$                   |                  | 0.31  | 1.21  | 0.65  | 3.9  |
| Low molecular weight parent PAHs                   | LMW-PAHs         | 34.3  | 166.4 | 51.3  | 4.9  |
| High molecular weight parent PAHs without perylene | HMW-PAHs         | 20.4  | 185.5 | 40.8  | 9.1  |
| LMW-/HMW-PAHs                                      |                  | 0.76  | 2.17  | 1.50  | 2.8  |
| $\Sigma COM-PAHs$ <sup>1</sup>                     |                  | 17.2  | 172.3 | 36.8  | 10.0 |
| $\Sigma COM-PAHs / \Sigma 28PAHs$                  |                  | 0.13  | 0.31  | 0.19  | 2.4  |
| Total nitrogen                                     | TN               | 1.64  | 2.84  | 1.93  | 1.7  |
| Total carbon                                       | TC               | 49.7  | 62.7  | 55.5  | 1.3  |
| Inorganic carbon                                   | IC               | 11.5  | 38.4  | 27.8  | 3.3  |
| Total organic carbon                               | TOC              | 17.2  | 43.2  | 27.7  | 2.5  |
| Total sulfur                                       | TS               | 2.28  | 4.47  | 3.53  | 2.0  |
| TOC/TN                                             | C/N              | 9.12  | 23.4  | 14.4  | 2.6  |
| Loss on Ignition                                   | LOI              | 0.10  | 0.20  | 0.14  | 2.0  |

407

408 <sup>1</sup>  $\Sigma COM-PAHs$ : Combustion derived PAH = sum of FLUA, PYR, BaA, CHR, BbjkF, BeP, BaP, IcdP

409 and BghiP.

410

411

412



**Table S2.** Pearson correlation coefficients between sediment properties used in this study. **Bold** indicates that correlation is significant at the 0.01 level, and Underline indicates that correlation is significant at the 0.05 level in a two-tailed test.

|                | EC           | Char          | Soot          | Char/<br>Soot | Σ<br>OPAH     | ΣAZAs         | Retene        | Perylene      | ΣPAHs         | OPAH/<br>PAH  | Σ<br>LMW      | Σ<br>HMW      | LMW/<br>HMW   | ΣCOM          | ΣCOM/<br>ΣPAHs | TOC           | C/N           |
|----------------|--------------|---------------|---------------|---------------|---------------|---------------|---------------|---------------|---------------|---------------|---------------|---------------|---------------|---------------|----------------|---------------|---------------|
| EC             | 1            | <b>0.809</b>  | 0.161         | <b>0.645</b>  | 0.269         | 0.031         | 0.149         | 0.043         | 0.145         | 0.117         | 0.152         | 0.19          | -0.235        | 0.194         | 0.305          | 0.039         | -0.089        |
| Char           | <b>0.809</b> | 1             | <b>-0.45</b>  | <b>0.962</b>  | -0.068        | -0.251        | -0.338        | 0.189         | <u>-0.371</u> | <u>0.356</u>  | <u>-0.35</u>  | -0.316        | 0.115         | -0.313        | -0.051         | -0.271        | -0.122        |
| Soot           | 0.161        | <b>-0.45</b>  | 1             | <b>-0.635</b> | <b>0.534</b>  | <b>0.483</b>  | <b>0.794</b>  | -0.235        | <b>0.844</b>  | <u>-0.433</u> | <b>0.818</b>  | <b>0.819</b>  | <b>-0.550</b> | <b>0.820</b>  | <b>0.548</b>   | <b>0.515</b>  | 0.068         |
| Char/Soot      | <b>0.645</b> | <b>0.962</b>  | <b>-0.635</b> | 1             | -0.137        | -0.307        | <u>-0.419</u> | 0.202         | <b>-0.491</b> | <u>0.42</u>   | <b>-0.464</b> | <b>-0.445</b> | 0.243         | <b>-0.442</b> | -0.184         | -0.341        | -0.119        |
| ΣOPAH          | 0.269        | -0.068        | <b>0.534</b>  | -0.137        | 1             | <b>0.676</b>  | <b>0.69</b>   | <b>-0.56</b>  | <b>0.592</b>  | <u>0.376</u>  | <b>0.59</b>   | <b>0.59</b>   | -0.323        | <b>0.593</b>  | 0.305          | <b>0.559</b>  | 0.306         |
| ΣAZAs          | 0.031        | -0.251        | <b>0.483</b>  | -0.307        | <b>0.676</b>  | 1             | <b>0.503</b>  | <b>-0.608</b> | <b>0.529</b>  | 0.04          | <b>0.48</b>   | <b>0.515</b>  | <u>-0.452</u> | <b>0.516</b>  | 0.293          | <b>0.762</b>  | <b>0.565</b>  |
| Retene         | 0.149        | -0.338        | <b>0.794</b>  | <u>-0.419</u> | <b>0.690</b>  | <b>0.503</b>  | 1             | -0.281        | <b>0.905</b>  | -0.233        | <b>0.88</b>   | <b>0.885</b>  | <b>-0.513</b> | <b>0.888</b>  | <b>0.577</b>   | <b>0.547</b>  | 0.074         |
| Perylene       | 0.043        | 0.189         | -0.235        | 0.202         | <b>-0.560</b> | <b>-0.608</b> | -0.281        | 1             | -0.157        | <u>-0.388</u> | -0.165        | -0.186        | 0.073         | -0.192        | -0.044         | <b>-0.515</b> | <b>-0.499</b> |
| ΣPAHs          | 0.145        | <u>-0.371</u> | <b>0.844</b>  | <b>-0.491</b> | <b>0.592</b>  | <b>0.529</b>  | <b>0.905</b>  | -0.157        | 1             | <b>-0.485</b> | <b>0.982</b>  | <b>0.984</b>  | <b>-0.647</b> | <b>0.984</b>  | <b>0.692</b>   | <b>0.609</b>  | 0.064         |
| OPAH/PAH       | 0.117        | <u>0.356</u>  | <u>-0.433</u> | <u>0.42</u>   | <u>0.376</u>  | 0.04          | -0.233        | <u>-0.388</u> | <b>-0.485</b> | 1             | <u>-0.445</u> | <u>-0.448</u> | 0.347         | <u>-0.444</u> | -0.32          | -0.187        | 0.105         |
| Σ<br>LMW-PAH   | 0.152        | <u>-0.35</u>  | <b>0.818</b>  | <b>-0.464</b> | <b>0.590</b>  | <b>0.48</b>   | <b>0.88</b>   | -0.165        | <b>0.982</b>  | <u>-0.445</u> | 1             | <b>0.979</b>  | <b>-0.582</b> | <b>0.978</b>  | <b>0.698</b>   | <b>0.577</b>  | 0.016         |
| Σ<br>HMW-PAH   | 0.19         | -0.316        | <b>0.819</b>  | <b>-0.445</b> | <b>0.590</b>  | <b>0.515</b>  | <b>0.885</b>  | -0.186        | <b>0.984</b>  | <u>-0.448</u> | <b>0.979</b>  | 1             | <b>-0.714</b> | <b>1.00</b>   | <b>0.793</b>   | <b>0.581</b>  | 0.026         |
| LMW/HMW        | -0.235       | 0.115         | <b>-0.55</b>  | 0.243         | -0.323        | <b>-0.452</b> | <b>-0.513</b> | 0.073         | <b>-0.647</b> | 0.347         | <b>-0.582</b> | <b>-0.714</b> | 1             | -0.711        | <b>-0.87</b>   | <u>-0.409</u> | -0.075        |
| ΣCOM           | 0.194        | -0.313        | <b>0.82</b>   | <b>-0.442</b> | <b>0.593</b>  | <b>0.516</b>  | <b>0.888</b>  | -0.192        | <b>0.984</b>  | <u>-0.444</u> | <b>0.978</b>  | <b>1.00</b>   | <b>-0.711</b> | 1             | <b>0.795</b>   | <b>0.582</b>  | 0.027         |
| ΣCOM/<br>ΣPAHs | 0.305        | -0.051        | <b>0.548</b>  | -0.184        | 0.305         | 0.293         | <b>0.577</b>  | -0.044        | <b>0.692</b>  | -0.32         | <b>0.698</b>  | <b>0.793</b>  | <b>-0.87</b>  | <b>0.795</b>  | 1              | 0.29          | -0.165        |
| TOC            | 0.039        | -0.271        | <b>0.515</b>  | -0.341        | <b>0.559</b>  | <b>0.762</b>  | <b>0.547</b>  | <b>-0.515</b> | <b>0.609</b>  | -0.187        | <b>0.577</b>  | <b>0.581</b>  | <u>-0.409</u> | <b>0.582</b>  | 0.29           | 1             | <b>0.78</b>   |
| C/N            | -0.089       | -0.122        | 0.068         | -0.119        | 0.306         | <b>0.565</b>  | 0.074         | <b>-0.499</b> | 0.064         | 0.105         | 0.016         | 0.026         | -0.075        | 0.027         | -0.165         | <b>0.78</b>   | 1             |
